# Supplementary material for: Peripheral circadian rhythms in the liver and white adipose tissue of mice are attenuated by constant light and restored by time-restricted feeding
Source: PubMed Central journal article supplement (PMC7292356; doi:10.1371/journal.pone.0234439), 2020-06-12

# S1 Fig

**A**

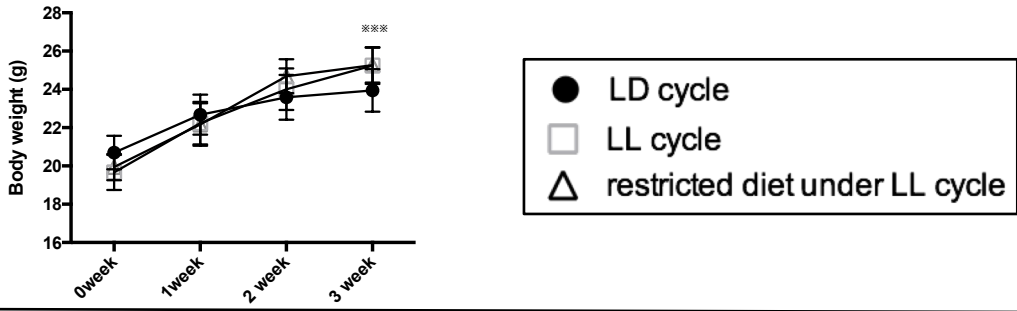

**B** **Liver**

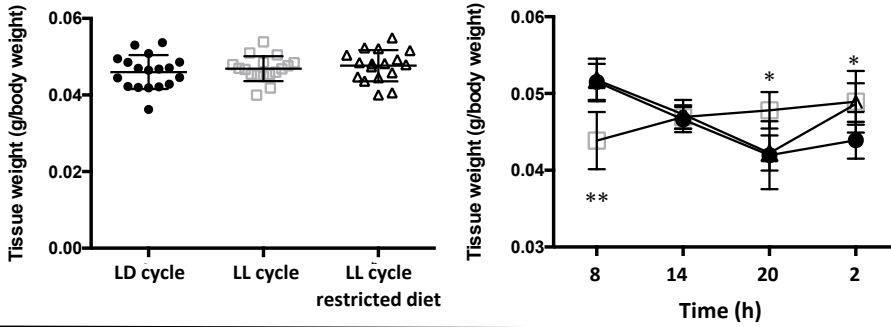

**C** **WAT**

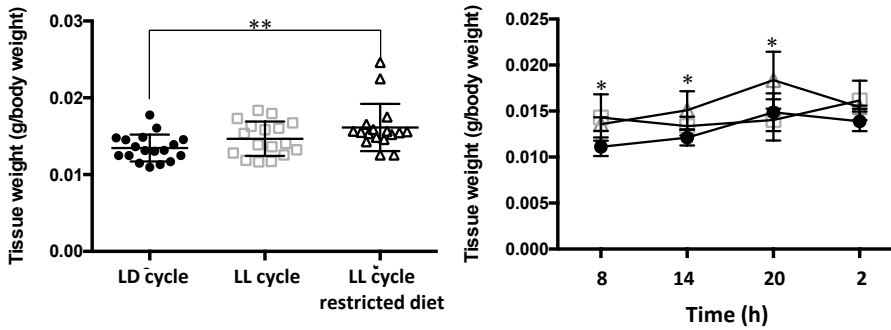

**D**

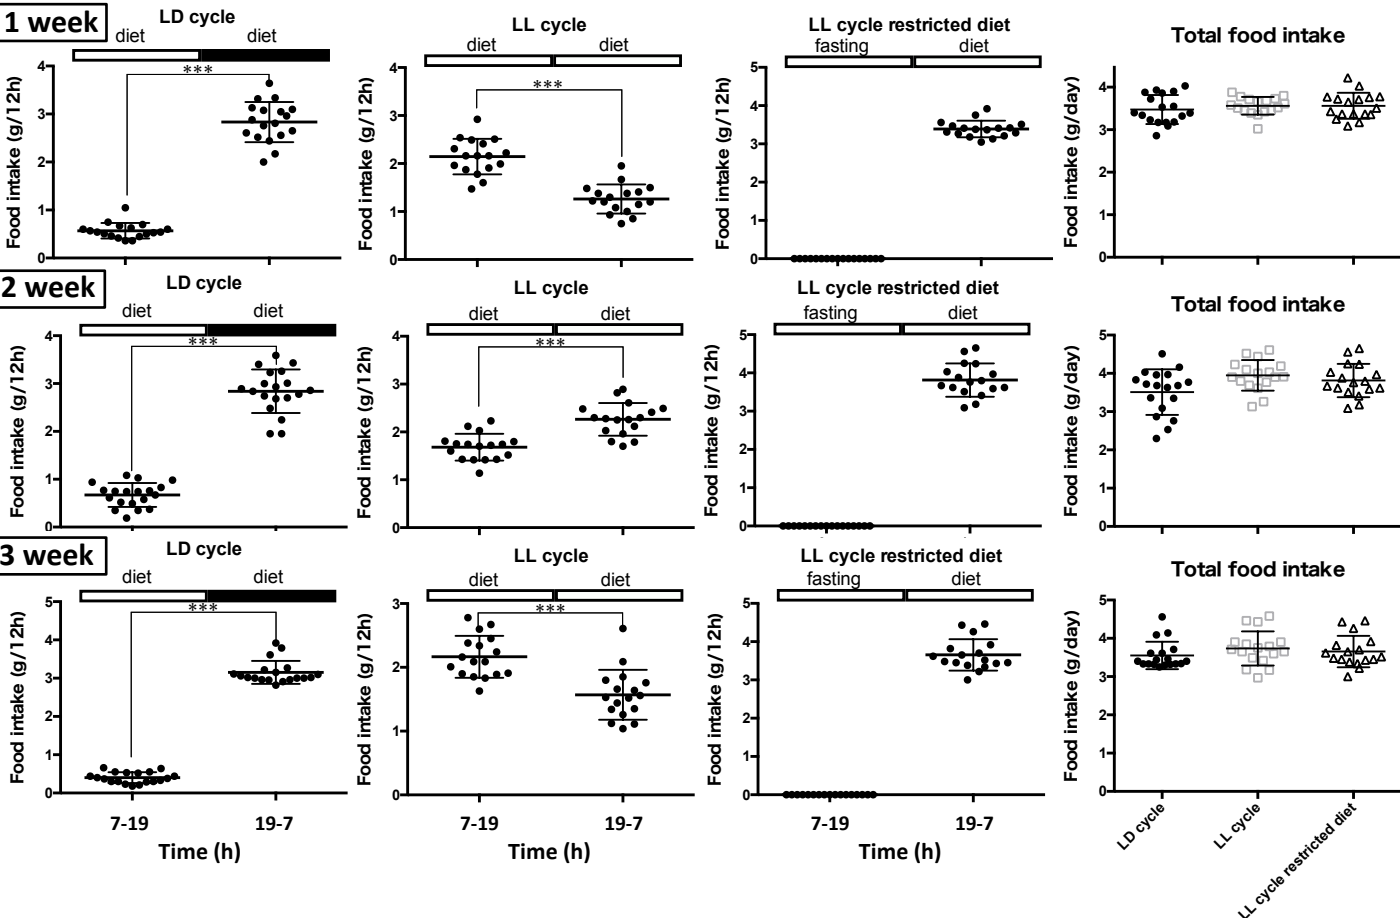

Supplement: pone.0234439.s001.pdf [file pone.0234439.s001.pdf]
